# Supplementary material for: Recent Advances in Aptamer-Based Biosensors for Bacterial Detection
Source: MDPI journal article supplement (doi:10.3390/bios14050210), 2024-04-23
Supplement: s1 [file s1]

*Supplementary Data*

# Recent Advances in Aptamer-Based Biosensors for Bacterial Detection

Vincent L guillier <sup>1,2</sup>, Brahim Heddi <sup>2,\*</sup> and Jasmina Vidic <sup>1,\*</sup>

<sup>1</sup> INRAE, AgroParisTech, Micalis Institut, Universit  Paris-Saclay, UMR 1319, 78350 Jouy-en-Josas, France

<sup>2</sup> ENS Paris-Saclay, Laboratoire de Biologie et Pharmacologie Appliqu e (LBPA), UMR8113 CNRS, 91190 Gif-sur-Yvette, France

\* Correspondence: brahim.heddi@ens-cachan.fr (B.H.); jasmina.vidic@inrae.fr (J.V.)

## Summary

- **Table S1.** Sequence of aptamers used for bacterial detection

- **References**

**Table S1. Sequences of aptamer used in biosensors for bacterial detection.**

| Bacteria         | Aptamer             | Sequence                                                                                    | Ref   |
|------------------|---------------------|---------------------------------------------------------------------------------------------|-------|
| <i>S. aureus</i> | SA20                | GCGCCCTCTCACGTGGCATCAGAGTGCCGGAAGTTCTGCGTTAT                                                | [1]   |
|                  | SA23                | GGGCTGGCCAGATCAGACCCCGGATGATCATCCTTGTGAGAACCA                                               |       |
|                  | SA34                | CACAGTCACTCAGACGGCCGCTATTGTTGCCAGATTGCCTTTGGC                                               |       |
|                  | SA31                | TCCCACGATCTCATTAGTCTGTGGATAAGCGTGGGACGTCTATGA                                               |       |
|                  | SA43                | TCGGCACGTTTCTCAGTAGCGCTCGCTGGTCATCCCACAGCTACGTC                                             |       |
| <i>S. aureus</i> | T1                  | ACTGTCrGrCrGrCrArCrGrCrGrUrGrUrGrUrArGrUrArCrArCrArCrGrArUrCrGrCrGrCrGrCrArCrArUrArU        | [2]   |
|                  | T2                  | ACTGTCrArArUrUrUrGrArArUrArUrArUrArGrUrGrCrGrCrGrCrGrUrArGrUrGrUrGrUrArArArArUrU            |       |
|                  | T3                  | ACTGTCrArArUrUrUrGrArGrUrGrUrGrUrGrArUrCrArUrArUrArUrCrGrUrArGrCrGrCrGrUrArCrArArCrC        |       |
|                  | A14                 | ACTGTCCACACCGCAGCAGTGGGAACGTTTCAGCCATGCAAGCATCACGCCCCGT                                     |       |
| <i>S. aureus</i> | H1                  | GCAATGGTACGGTACTTCCTCGGCACGTTCTCAGTAGCGCTCGCTGGTCATCCCACAGCTACGTCAAAAGTGACGCTACT<br>TTGCTAA | [3]   |
| <i>S. aureus</i> | H1                  | GCAATGGTACGGTACCCCTATGCGCATGTACCATTGCAGTTGTCAGAGAGCGA                                       | [4]   |
|                  | H2                  | GGTACA/Dabcyl/TGCGCATAGGGGTACCGTACCATAACCCCTATGCGCA/FAM/                                    |       |
|                  | cApt                | GTACCGTACCATTGCTAGCGTCTTCCCGTCCTT                                                           |       |
| <i>S. aureus</i> | Apt1                | TCCCTACGGCGCTAACCCCCCAGTCCGTCCTCCCAGCCTCACACCGCCACCGTGCTACAAC                               | [5,6] |
|                  | Apt2                | TCCCTACGGCGCTAACCTCCCAACCGTCCACCCTGCCTCCGCCTCGCCACCGTGCTACAAC                               |       |
| <i>S. aureus</i> | SH-Apt <sub>2</sub> | GCAATGGTACGGTACTTCCTCGGCACGTTCTCAGTAGCGCTCGCTGGTCATCCCACAGCTACGTCAAAAGTGACGCTACT<br>TTGCTAA | [7,8] |
| <i>S. aureus</i> | A15                 | AGCAG CACAGAGGTCAGATG(N40)CCTATGCGTGCTACCGTGAA-                                             | [9]   |
| <i>S. aureus</i> | APT <sup>seb1</sup> | GGTATTGAGGGTCGCATCCACTGGTCGTTGTTGTCTGTTGTCTGTTATGTTGTTTCGTGATGGCTCTAACTCTCCTCT              | [10]  |
| <i>S. aureus</i> | A-SEB               | TGCAGGATCCGGTATCCGTGCACACACACCCAACAACCAGCTGCCGCACCGGAGGAATTCTCGT                            | [11]  |
| <i>S. aureus</i> | G1                  | UCCGAACAGCGGAAGGUGGUUCGAAGUUGGGGCUUUGGA                                                     | [12]  |
|                  | #2                  | GGGAGUUUUGAUACGGCUUCAUGCAGUAAUGUUUUUAU                                                      |       |
|                  | #18                 | UCCGAACAGCGGAAGGUGGUUCGAAGUUGGGGCUUUGGA                                                     |       |

|                  |                                                          |                                                                                                                                                                                                                                                                                                                                                                                                                                             |         |
|------------------|----------------------------------------------------------|---------------------------------------------------------------------------------------------------------------------------------------------------------------------------------------------------------------------------------------------------------------------------------------------------------------------------------------------------------------------------------------------------------------------------------------------|---------|
| <i>S. aureus</i> | AT-27<br>AT-33<br>AT-36<br>AT-49                         | ACCCCTGCAGGATCCTTTGCTGGTACC-(N42)-AGTATCGCTAATCAGTCTAGAGGGCCCCAGAAT                                                                                                                                                                                                                                                                                                                                                                         | [13]    |
| <i>S. aureus</i> | H1, P1                                                   | GCAATGGTACGGTACTTCCTCGGCACGTTCTCAGTAGCGCTCGCTGGTCATCCCACAGCTACGTCAAAAGTGCACGCTACT<br>TTGCTAA                                                                                                                                                                                                                                                                                                                                                | [14]    |
| <i>S. aureus</i> | Antibac1<br>Antibac2                                     | GGGACAGGGAGTGCGCTGCTCCCC<br>GGGGACTAGAGGACTTGTGCGGCC                                                                                                                                                                                                                                                                                                                                                                                        | [15,16] |
| <i>E. coli</i>   | SH-Apt <sub>1</sub>                                      | GCAATGGTACGGTACTTCCCCATGAGTGTTGTGAAATGTTGGGACACTAGGTGGCATAGAGCCGCAAAAGTGCAGCTACT<br>TTGCTAA                                                                                                                                                                                                                                                                                                                                                 | [17,18] |
| <i>E. coli</i>   | /                                                        | ATCCGTCACACCTGCTCTATCAAATGTGCAGATATCAAGACGATTTGTACAAGATGGTGTGGCTCCCGTAT                                                                                                                                                                                                                                                                                                                                                                     | [19]    |
| <i>E. coli</i>   | GN6<br>GN12                                              | ATACCAGCTTATTCAATTGGGTGAGGGGGGGTTACAACGTTAAAGATAGACGGGGGAAGATAGTAAGTGAATCT                                                                                                                                                                                                                                                                                                                                                                  | [20]    |
| <i>E. coli</i>   | 6-3<br>8-1<br>8-7<br>8-8<br>8-12<br>8-13<br>8-19<br>8-35 | UGGUUUCAGCGACAGGAGGGGUGUAGGUGGAUUGCUGUCCUUUGCGUGU<br>UGCUAGUGUUGUAUGCAGGUGGAGGAGGCGUACACUUGCUUUGUGGU<br>GAUUGACCGUAUGGAGGAUGCAAAGGGAGGGAGGUCACUUGAGUUAGUUA<br>GCAGGAUGUGGAGGAGGCAUCUGCUGCAAUCGGGACUUGUGUCGAGUAUC<br>GCAUUGUCUGCGUGUGGAGGCAGGAGGCAAGAUAAAGAGGUGAUGCGGUUG<br>CAUGUUGGCGAUACGUCUAAAACGGUGGGUUGUGGAGGAUUGAUUUUAUACG<br>AGUAGUGUCAGCGUGUGGUGGAGGUUGGCGACAUAUGUAGGGUGCGAUUG<br>UGCGCAAUACACGGUGAGGAGGUGGAGAGAUGUAGGUGCUUAGCAGUUGA | [21]    |
| <i>E. coli</i>   | ECA I<br>ECA II                                          | GTCTGCGAGCGGGGCGCGGGCCCCGGCGGGGGATGCGC<br>ACGGCGCTCCCAACAGGCCTCTCCTTACGGCATATTA                                                                                                                                                                                                                                                                                                                                                             | [22,23] |
| <i>E. coli</i>   | /                                                        | GCAATGGTACGGTACTTCCCCATGAGTGTTGTGAAATGTTGGGACACTAGGTGGCATAGAGCCGCAAAAGTGCACGCTAC<br>TTTGCTAA                                                                                                                                                                                                                                                                                                                                                | [24]    |
| <i>E. coli</i>   | Stx1<br>stx2                                             | ATCCAGAGTGACGCAGCAGTAGTTTGTGGTTATTACGGCGGGTTGCGATGGGTGCGAATCGGTGGACACGGTGGCTTAG<br>T<br>ATCCAGAGTGACGCAGCAGGAAAGGACGTCAAATTAGGGGCCGGGACAACGAAAGCCCACAACCTGGACGGTGGCTTAG<br>T                                                                                                                                                                                                                                                                | [25]    |

|                                |                |                                                                                                                                                                                                                                                                                               |         |
|--------------------------------|----------------|-----------------------------------------------------------------------------------------------------------------------------------------------------------------------------------------------------------------------------------------------------------------------------------------------|---------|
| <i>E.coli</i>                  | E1<br>E2<br>E3 | GCAATGGTACGGTACTTCCACTTAGGTCGAGGTTAGTTTGTCTTGCTGGCGCATCCACTGAGCGCAAAAGTGCACGCTACT<br>TTGCTAA<br>GCAATGGTACGGTACTTCCCCATGAGTGTTGTGAAATGTTGGGACACTAGGTGGCATAGAGCCGCAAAAGTGCACGCTAC<br>TTTGCTA<br>GCAATGGTACGGTACTTCCGTTGCACTGTGCGGCCGAGCTGCCCCCTGGTTTGTGAATACCCTGGGCAAAAGTGCACGCT<br>ACTTTGCTAA | [26]    |
| <i>P. aeruginosa</i>           | F23            | CCCCCGTTGCTTTCGCTTTTCCTTTCGCTTTTGTTCGTTTCGTCCCTGCTTCCTTCTTG                                                                                                                                                                                                                                   | [27]    |
| <i>B. cereus</i>               | /              | AGCAGCACAGAGGTCAGATGCCCCCTTTTATCCGTCGGCATGATGTCTCCCGATCCGGTCCTATGCGTGCTA                                                                                                                                                                                                                      | [28]    |
| <i>B. cereus</i>               | B15<br>B16     | AGCAGCACAGAGGTCAGATGGGCGGGTTTGATCTTTGGTTGGCGCCTGTTTCTTTATGACCTATGCGTGCTACCGTGAA<br>AGCAGCACAGAGGTCAGATGATATGTTTACGCCAGTGGTATTATTGGGGTTGATATGTCACCTATGCGTGCTACCGTGAA                                                                                                                           | [29]    |
| <i>B. cereus</i>               | 13-18<br>13-24 | AGCACAGAGGTCAGATGGGCTACTGGAGCATCTGGTAACGAAGTACCCTCGGGGCGG<br>AGCACAGAGGTCAGATGATCGAGGGCGCAGACCGAACCCGCGTGCGCAGTACAAGGGC                                                                                                                                                                       | [30]    |
| <i>Acinetobacter baumannii</i> | AB             | AATCAGGCTCAGCATGGAGTTGCGAGGCCAATATCCGGTTAAGCG                                                                                                                                                                                                                                                 | [31,32] |
| <i>Acinetobacter baumannii</i> | K2             | ACAGCACCACAGACCACATATCACATGCTGTGCGCTTGCGATATCAATTCCAGTGATGTTTGTCTTCCTGCC                                                                                                                                                                                                                      | [31]    |
| <i>Leptospira interrogans</i>  | LAP3           | TGGCGTTAGAGATACCGGAACCGGTGTCGGGCGTCTGAAGAATCC                                                                                                                                                                                                                                                 | [33]    |
| <i>Bacillus cytotoxicus</i>    | BAS6R          | ATCCGTCACACCTGCTCTGCACGGGCTCAGTTTGGCTTTGTATCCTAAGAGGATGGTGTTGGCTCCCGTAT                                                                                                                                                                                                                       | [34]    |
| <i>Vibrio cholerae</i>         | CT916          | GGCAAAAAGGATTGCCAGGTCTGCTGTCTAGCCGGATTC                                                                                                                                                                                                                                                       | [35]    |
| <i>Clostridium difficile</i>   | /              | TAGTGATGCCTTTGTTGAGA-[N40]-TCTTCATCGTCCACTAAATT                                                                                                                                                                                                                                               | [36]    |
| <i>S. typhimurium</i>          | H2             | TATGGCGGCGTCACCCGACGGGGACTTGACATTATGACAG                                                                                                                                                                                                                                                      | [14]    |
| <i>S. Typhimurium</i>          | Apt S.T        | TGGCTAGCTCAGTCATATGGCGGCGTCACCCGACGGGGACTTGACATTATGACAGCCGCG                                                                                                                                                                                                                                  | [37]    |

|                                    |        |                                                              |      |
|------------------------------------|--------|--------------------------------------------------------------|------|
| <i>Vibrio<br/>parahaemolyticus</i> | Apt VP | TGGCTAGCTCAGTCATCTAAAAATGGGCAAAGAAACAGTGACTCGTTGAGATACTCCGCG | [37] |
| <i>Clostridium<br/>perfringens</i> | /      | TCAACGGCAGTAACATTAGC                                         | [38] |

1. Cao X, Li S, Chen L, Ding H, Xu H, Huang Y, et al. Combining use of a panel of ssDNA aptamers in the detection of *Staphylococcus aureus*. *Nucleic Acids Research*. 2009 Aug;37(14):4621–8.
2. Wijesinghe KM, Sabbih G, Algama CH, Syed R, Danquah MK, Dhakal S. FRET-Based Single-Molecule Detection of Pathogen Protein IsdA Using Computationally Selected Aptamers. *Anal Chem*. 2023 Jul 4;95(26):9839–46.
3. Lian Y, He F, Wang H, Tong F. A new aptamer/graphene interdigitated gold electrode piezoelectric sensor for rapid and specific detection of *Staphylococcus aureus*. *Biosensors and Bioelectronics*. 2015 Mar;65:314–9.
4. Kang Q, Xing X yan, Zhang S qi, He L, Li J zhao, Jiao J bo, et al. A novel Aptamer-induced CHA amplification strategy for ultrasensitive detection of *Staphylococcus aureus* and NIR-triggered photothermal bactericidal Activity based on aptamer-modified magnetic Fe<sub>3</sub>O<sub>4</sub>@AuNRs. *Sensors and Actuators B: Chemical*. 2023 May;382:133554.
5. Abbaspour A, Norouz-Sarvestani F, Noori A, Soltani N. Aptamer-conjugated silver nanoparticles for electrochemical dual-aptamer-based sandwich detection of *staphylococcus aureus*. *Biosensors and Bioelectronics*. 2015 Jun;68:149–55.
6. Marin M, Rizzotto F, Léguillier V, Péchoux C, Borezee-Durant E, Vidic J. Naked-eye detection of *Staphylococcus aureus* in powdered milk and infant formula using gold nanoparticles. *Journal of Microbiological Methods*. 2022 Oct;201:106578.
7. Zhao W, Yang S, Zhang D, Zhou T, Huang J, Gao M, et al. Ultrasensitive dual-enhanced sandwich strategy for simultaneous detection of *Escherichia coli* and *Staphylococcus aureus* based on optimized aptamers-functionalized magnetic capture probes and graphene oxide-Au nanostars SERS tags. *Journal of Colloid and Interface Science*. 2023 Mar;634:651–63.
8. Kim YS, Song MY, Jurng J, Kim BC. Isolation and characterization of DNA aptamers against *Escherichia coli* using a bacterial cell–systematic evolution of ligands by exponential enrichment approach. *Analytical Biochemistry*. 2013 May;436(1):22–8.
9. Huang Y, Chen X, Xia Y, Wu S, Duan N, Ma X, et al. Selection, identification and application of a DNA aptamer against *Staphylococcus aureus* enterotoxin A. *Anal Methods*. 2014;6(3):690–7.
10. DeGrasse JA. A Single-Stranded DNA Aptamer That Selectively Binds to *Staphylococcus aureus* Enterotoxin B. Kourentzi K, editor. *PLoS ONE*. 2012 Mar 16;7(3):e33410.
11. Mousavi Nodoushan S, Nasirizadeh N, Amani J, Halabian R, Imani Fooladi AA. An electrochemical aptasensor for staphylococcal enterotoxin B detection based on reduced graphene oxide and gold nano-urchins. *Biosensors and Bioelectronics*. 2019 Feb;127:221–8.

12. Han SR, Lee SW. In vitro selection of RNA aptamer specific to *Staphylococcus aureus*. *Ann Microbiol.* 2014 Jun;64(2):883–5.
13. Alizadeh N, Memar MY, Mehramuz B, Abibiglou SS, Hemmati F, Samadi Kafil H. Current advances in aptamer-assisted technologies for detecting bacterial and fungal toxins. *J Appl Microbiol.* 2018 Mar;124(3):644–51.
14. Chen J, Huang Z, Luo Z, Yu Q, Xu Y, Wang X, et al. Multichannel-Structured Three-Dimensional Chip for Highly Sensitive Pathogenic Bacteria Detection Based on Fast DNA-Programmed Signal Polymerization. *Anal Chem.* 2018 Oct 16;90(20):12019–26.
15. Ferreira IM, De Souza Lacerda CM, De Faria LS, Corrêa CR, De Andrade ASR. Selection of Peptidoglycan-Specific Aptamers for Bacterial Cells Identification. *Appl Biochem Biotechnol.* 2014 Dec;174(7):2548–56.
16. Bakhshandeh F, Saha S, Sen P, Sakib S, MacLachlan R, Kanji F, et al. A universal bacterial sensor created by integrating a light modulating aptamer complex with photoelectrochemical signal readout. *Biosensors and Bioelectronics.* 2023 Sep;235:115359.
17. Moon, J.; Kim, G.; Park, S.B.; Lim, J.; Mo, C. Comparison of Whole-Cell SELEX Methods for the Identification of *Staphylococcus Aureus*-Specific DNA Aptamers. *Sensors* **2015**, *15*, 8884–8897. <https://doi.org/10.3390/s150408884>
18. Chen, C.; Li, M.; Xing, Y.; Li, Y.; Joedecke, C.C.; Jin, J.; Yang, Z.; Liu, D. Study of pH-Induced Folding and Unfolding Kinetics of the DNA i-Motif by Stopped-Flow Circular Dichroism. *Langmuir* **2012**, *28*, 17743–17748
19. Zhang Y, Liu Y, Yang Y, Li L, Tao X, Song E. Rapid detection of pathogenic bacteria based on a universal dual-recognition FRET sensing system constructed with aptamer-quantum dots and lectin-gold nanoparticles. *Chinese Chemical Letters.* 2023 Aug;34(8):108102.
20. Shin HS, Gedi V, Kim JK, Lee D ki. Detection of Gram-negative bacterial outer membrane vesicles using DNA aptamers. *Sci Rep.* 2019 Sep 11;9(1):13167.
21. Niles JC, Marletta MA. Utilizing RNA Aptamers To Probe a Physiologically Important Heme-Regulated Cellular Network. *ACS Chem Biol.* 2006 Sep 1;1(8):515–24.
22. Bruno JG, Carrillo MP, Phillips T, Andrews CJ. A Novel Screening Method for Competitive FRET-Aptamers Applied to *E. coli* Assay Development. *J Fluoresc.* 2010 Nov;20(6):1211–23.
23. Queirós RB, de-los-Santos-Álvarez N, Noronha JP, Sales MGF. A label-free DNA aptamer-based impedance biosensor for the detection of *E. coli* outer membrane proteins. *Sensors and Actuators B: Chemical.* 2013 May;181:766–72.

24. Jiang D, Yang C, Fan Y, Polly Leung HM, Inthavong K, Zhang Y, et al. Ultra-sensitive photoelectrochemical aptamer biosensor for detecting *E. coli* O157:H7 based on nonmetallic plasmonic two-dimensional hydrated defective tungsten oxide nanosheets coupling with nitrogen-doped graphene quantum dots (dWO<sub>3</sub>•H<sub>2</sub>O@N-GQDs). *Biosensors and Bioelectronics*. 2021 Jul;183:113214.
25. Kaur H, Shorie M, Sabherwal P. Biolayer interferometry-SELEX for Shiga toxin antigenic-peptide aptamers & detection via chitosan-WSe<sub>2</sub> aptasensor. *Biosensors and Bioelectronics*. 2020 Nov;167:112498.
26. Kim YS, Chung J, Song MY, Jurng J, Kim BC. Aptamer cocktails: Enhancement of sensing signals compared to single use of aptamers for detection of bacteria. *Biosensors and Bioelectronics*. 2014 Apr;54:195–8.
27. Schmitz FRW, Cesca K, Valério A, De Oliveira D, Hotza D. Colorimetric detection of *Pseudomonas aeruginosa* by aptamer-functionalized gold nanoparticles. *Appl Microbiol Biotechnol*. 2023 Jan;107(1):71–80.
28. Zheng H, Sheng R, Li H, Ahmad W, Chen Q. Rapid and selective detection of *Bacillus cereus* in food using cDNA-based up-conversion fluorescence spectrum copy and aptamer modified magnetic separation. *Spectrochimica Acta Part A: Molecular and Biomolecular Spectroscopy*. 2022 Feb;267:120618.
29. Duan N, Ye M, Lu M, Chen X, Wu S. DNA aptamers selection and characterization for development of impedimetric aptasensor for *Bacillus cereus* at different growing stages. *Advanced Agrochem*. 2023 Sep;2(3):284–90.
30. Zhou Z, Lan X, Zhu L, Zhang Y, Chen K, Zhang W, et al. Portable dual-aptamer microfluidic chip biosensor for *Bacillus cereus* based on aptamer tailoring and dumbbell-shaped probes. *Journal of Hazardous Materials*. 2023 Mar;445:130545.
31. Effah CY, Ding L, Tan L, He S, Li X, Yuan H, et al. A SERS bioassay based on vancomycin-modified PEI-interlayered nanocomposite and aptamer-functionalized SERS tags for synchronous detection of *Acinetobacter baumannii* and *Klebsiella pneumoniae*. *Food Chemistry*. 2023 Oct;423:136242.
32. Abedi R, Raoof JB, Mohseni M, Bagheri Hashkavayi A. Development of a label-free impedimetric aptasensor for the detection of *Acinetobacter baumannii* bacteria. *Analytical Biochemistry*. 2023 Oct;679:115288.
33. Vishwakarma A, Meganathan Y, Ramya M. Aptamer-based assay for rapid detection, surveillance, and screening of pathogenic *Leptospira* in water samples. *Sci Rep*. 2023 Aug 17;13(1):13379.
34. Rizzotto F, Marin M, Péchoux C, Auger S, Vidic J. Colorimetric aptasensor for detection of *Bacillus cytotoxicus* spores in milk and ready-to-use food. *Heliyon*. 2023 Jul;9(7):e17562.



35. Frohnmeyer E, Frisch F, Falke S, Betzel C, Fischer M. Highly affine and selective aptamers against cholera toxin as capture elements in magnetic bead-based sandwich ELAA. *Journal of Biotechnology*. 2018 Mar;269:35–42.
36. Luo P, Liu Y, Xia Y, Xu H, Xie G. Aptamer biosensor for sensitive detection of toxin A of *Clostridium difficile* using gold nanoparticles synthesized by *Bacillus stearothermophilus*. *Biosensors and Bioelectronics*. 2014 Apr;54:217–21.
37. Hu J, Shen Z, Tan L, Yuan J, Gan N. Electrochemical aptasensor for simultaneous detection of foodborne pathogens based on a double stirring bars-assisted signal amplification strategy. *Sensors and Actuators B: Chemical*. 2021 Oct;345:130337.
38. Wang W, Yuan W, Wang D, Mai X, Wang D, Zhu Y, et al. Dual-mode sensor based on the synergy of magnetic separation and functionalized probes for the ultrasensitive detection of *Clostridium perfringens*. *RSC Adv*. 2022;12(39):25744–52.
